# Supplementary material
Source: PubMed Central journal article supplement (PMC4119298)

Figure S1

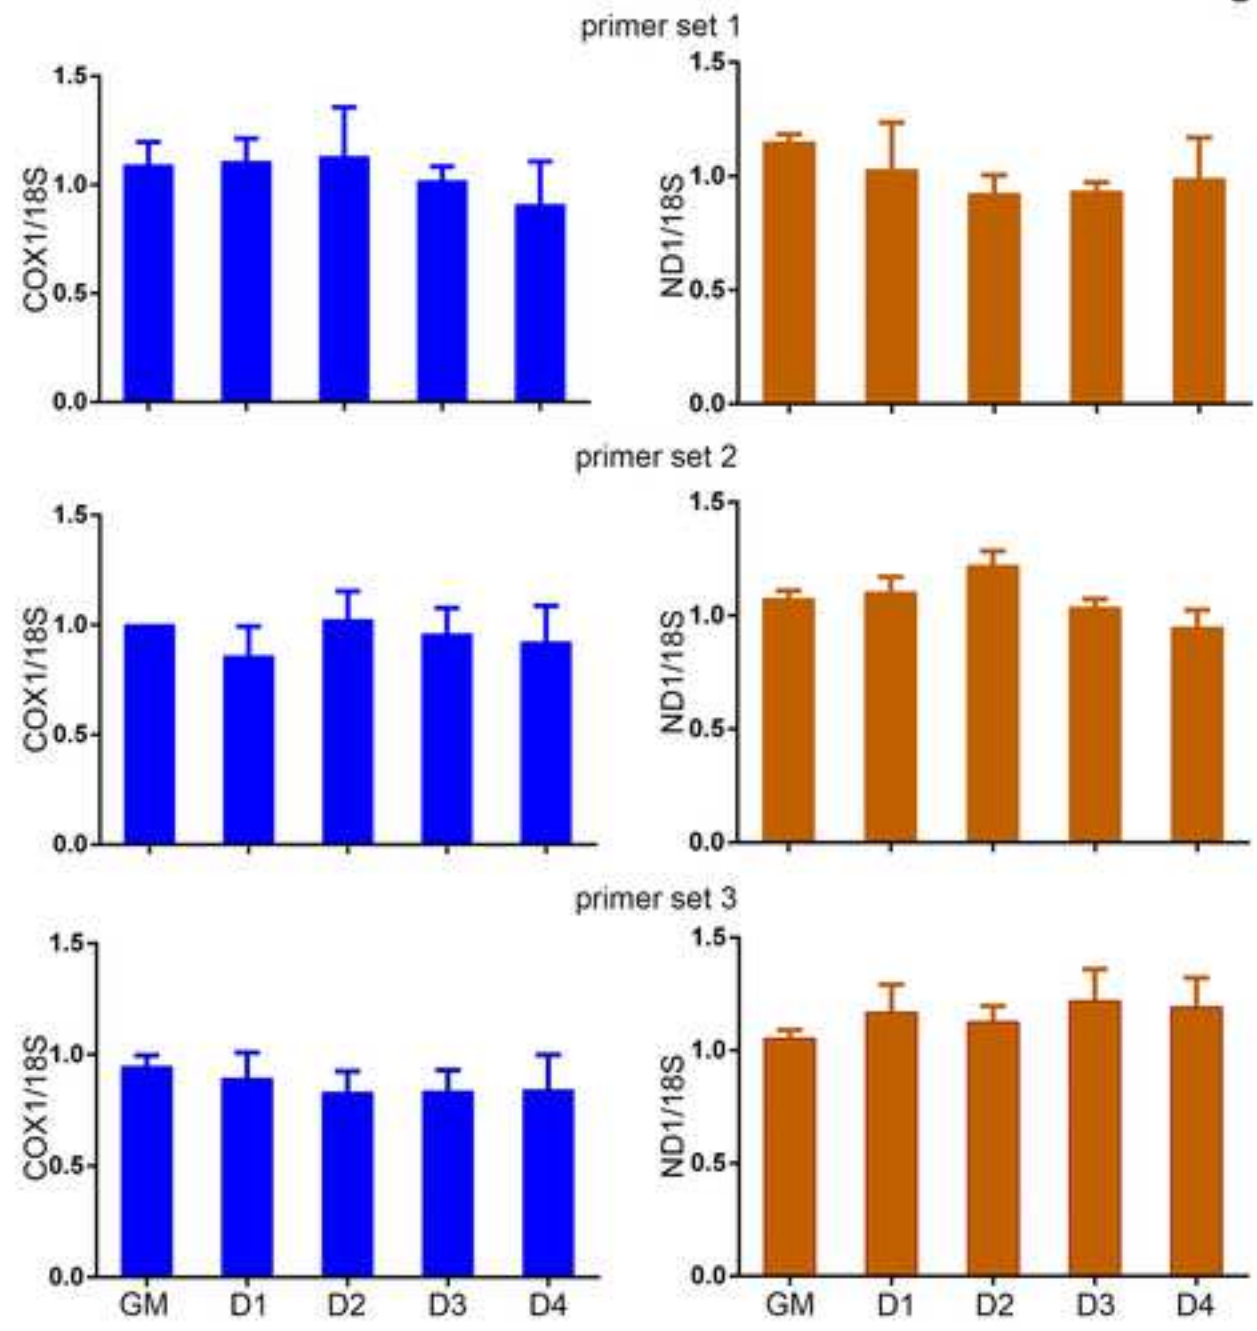

Figure S2

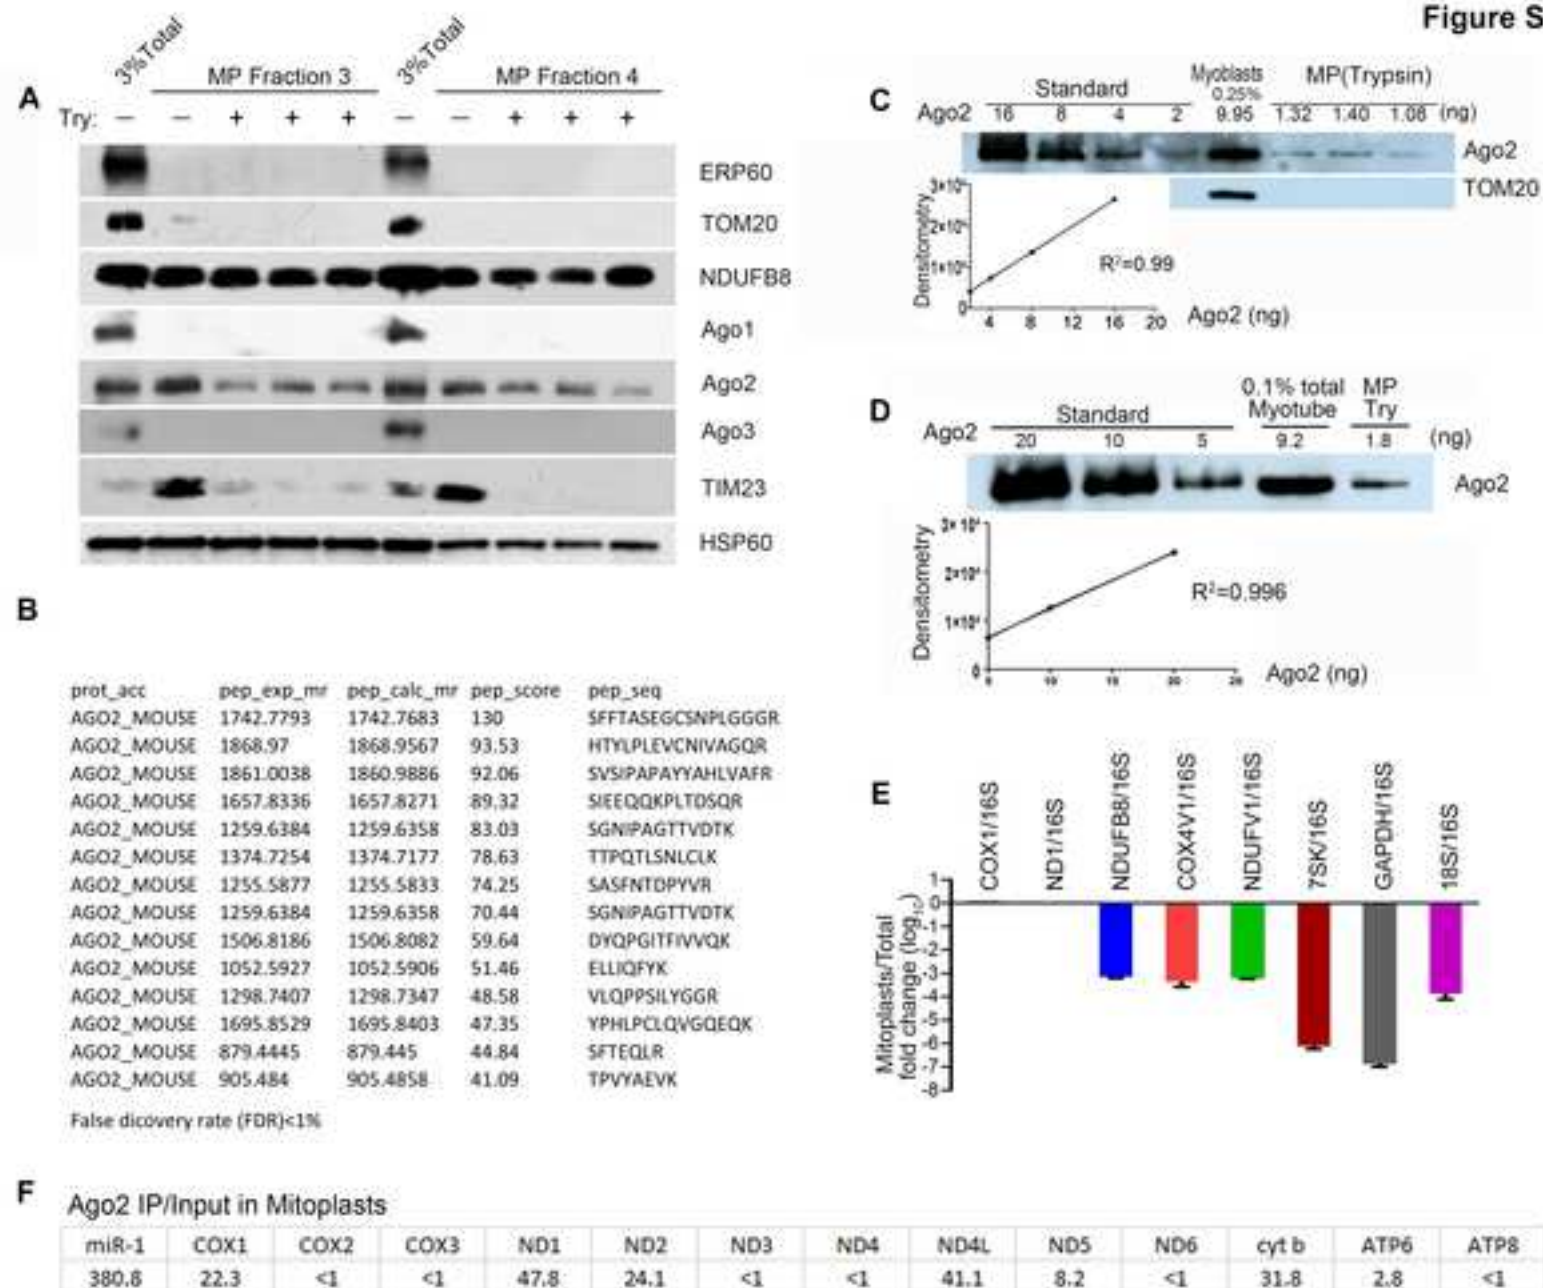

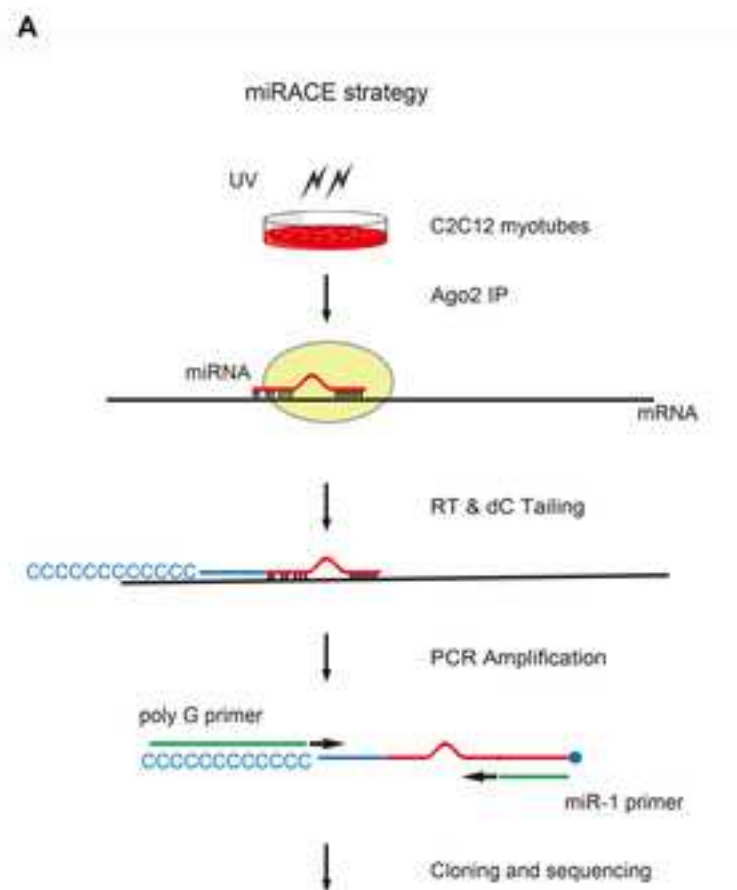

**B** miR-1 target gene information

| Gene   | Location                   | copy number | mt   | Description                           |
|--------|----------------------------|-------------|------|---------------------------------------|
| ND1    | Mitochondrion Mus musculus | 28          | COX  | NADH dehydrogenase subunit 1          |
| ND5    | Mitochondrion Mus musculus | 4           | COX  | NADH dehydrogenase subunit 5          |
| ATP6   | Mitochondrion Mus musculus | 3           | COX  | ATP 6, ATP synthase F0 subunit        |
| COX1   | Mitochondrion Mus musculus | 2           | COX  | Cytochrome c oxidase subunit 1        |
| ND4    | Mitochondrion Mus musculus | 3           | COX  | NADH dehydrogenase subunit 4          |
| FA2H1  | Chr. 19 Mus musculus       | 1           | COO  | Fatty acid desaturase 1               |
| RL12   | Chr. 11 Mus musculus       | 7           | S12B | Elongation factor RNA polymerase II 2 |
| CLK    | Chr. 1 Mus musculus        | 6           | COO  | CDC like kinase                       |
| COL5A1 | Chr. 1 Mus musculus        | 2           | COO  | alpha 1 chain of type V collagen      |

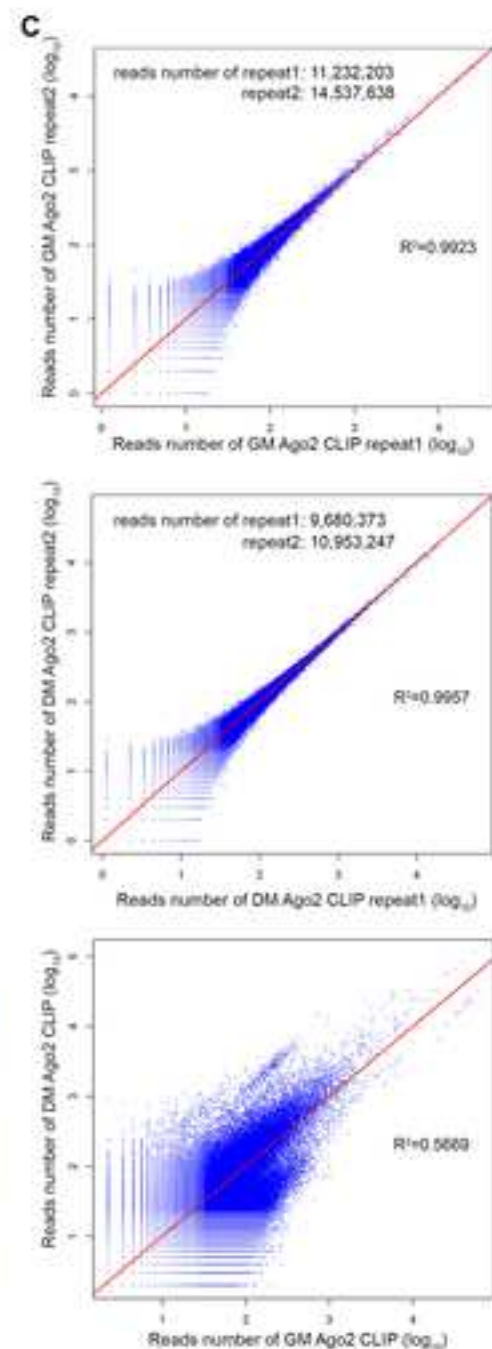

**Figure S3**

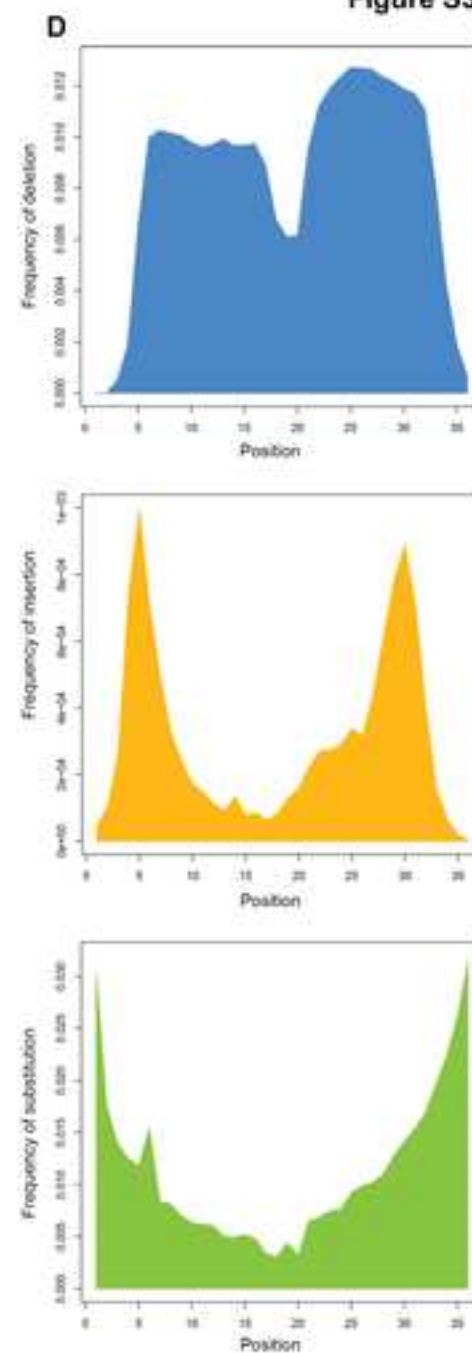

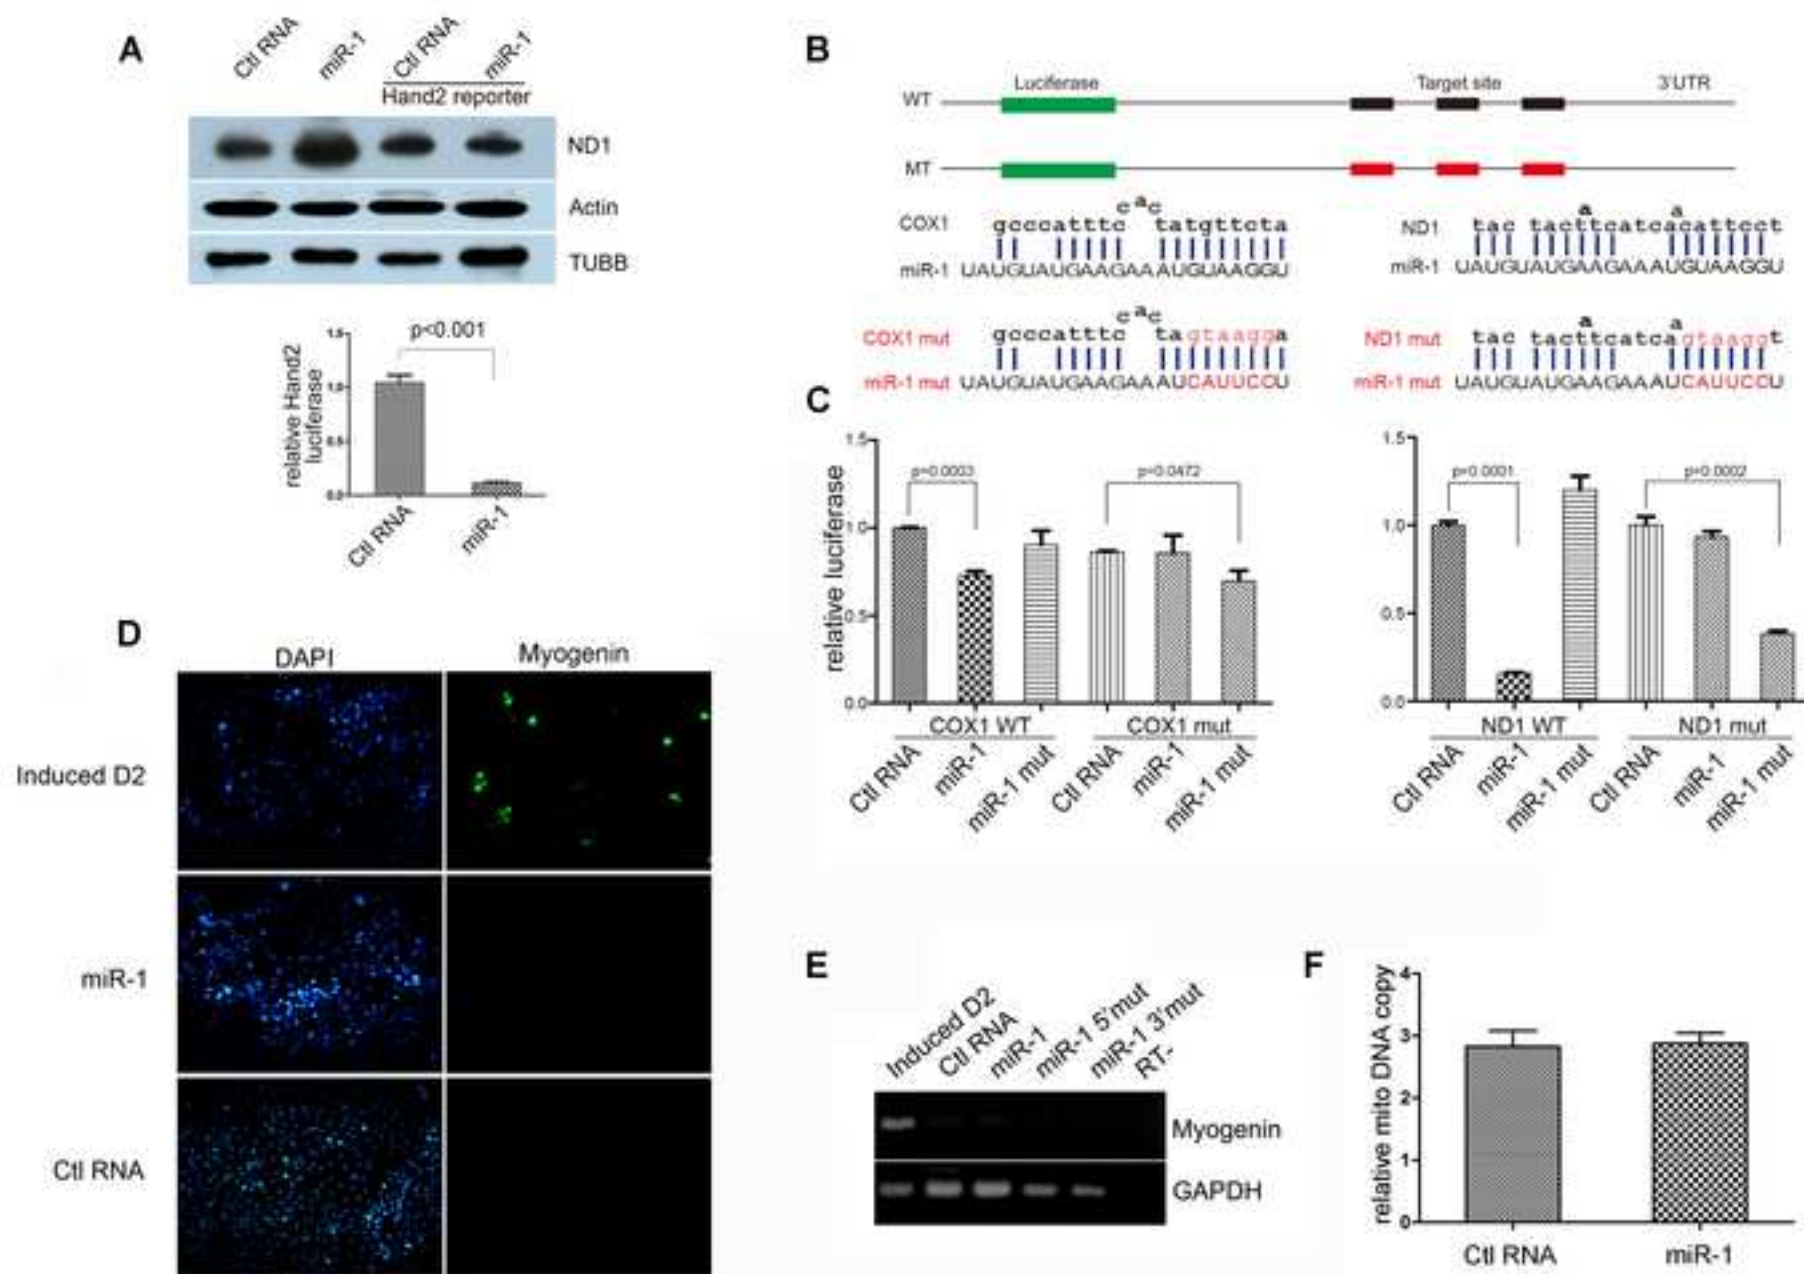

Supplement: NIHMS607176-supplement-02.pdf [file NIHMS607176-supplement-02.pdf]
